# Supplementary material for: Anti-Inflammatory Activity of Exopolysaccharides from Phormidium sp. ETS05, the Most Abundant Cyanobacterium of the Therapeutic Euganean Thermal Muds, Using the Zebrafish Model
Source: PubMed Central journal article supplement (PMC7226003; doi:10.3390/biom10040582), 2020-04-10
Supplement: biomolecules-10-00582-s001.pdf [file biomolecules-10-00582-s001.pdf]

1 **Supplementary materials**

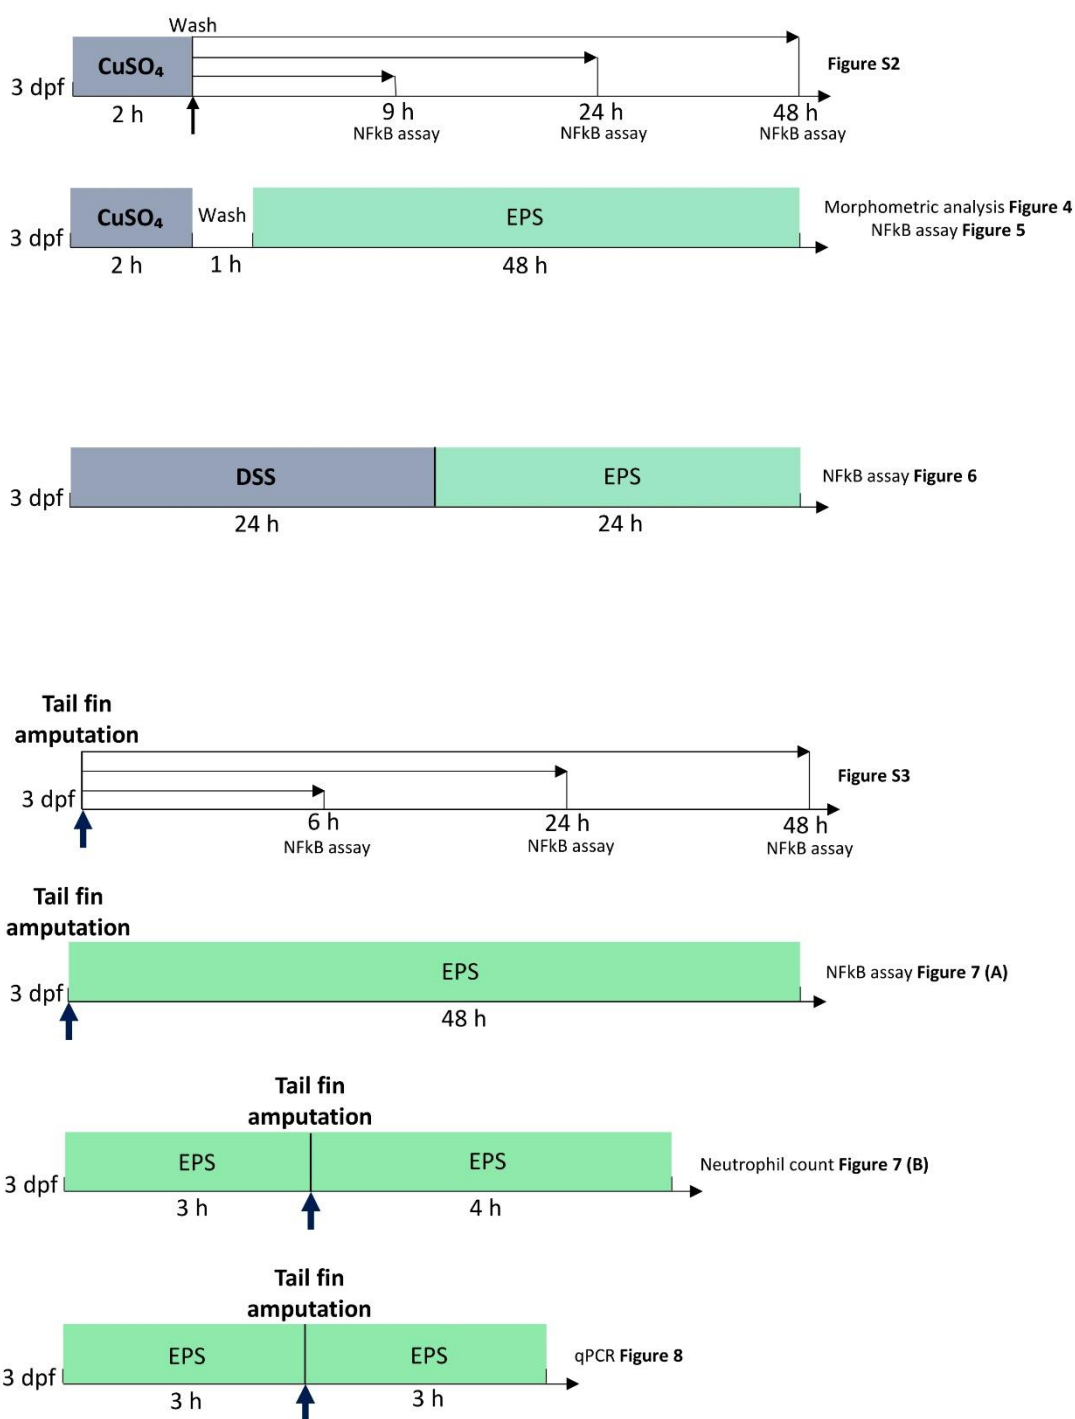

2  
3  
4  
5  
6

Figure S1. Schematic representation of chemically and injury-induced inflammation models used.

7  
8

Table S1. Primers for Real-Time PCR

| Gene                            | Forward (5'-3')           | Reverse (5'-3')          | Genbank acc. no. |
|---------------------------------|---------------------------|--------------------------|------------------|
| <i>il1b</i>                     | GACATGCTCATGGCGAACG       | GCAAATCGTGCATTGCAAGACG   | NM_212844        |
| <i>il6</i>                      | GTGAAGACACTCAGAGACG       | GTTAGACATCTTTCCGTGCTG    | NM_001261449     |
| <i>il8</i>                      | TTGAAGGAATGAGCTTGAGAGG    | TCATGGAGCAGAGGGGTC       | XM_009306855     |
| <i>mmp9</i>                     | CATTAAAGATGCCCTGATGTATCCC | AGTGGTGGTCCGTGGTTGAG     | NM_213123        |
| <i>mmp13</i>                    | ATGGTGCAAGGCTATCCCAAGAGT  | GCCTGTTGTTGGAGCCAAACTCAA | NM_001290479     |
| <i><math>\beta</math>-actin</i> | TGGGTATGGAATCTTGCGGT      | GTGGGGCAATGATCTTGATCT    | NM_181601        |

9  
10  
11  
12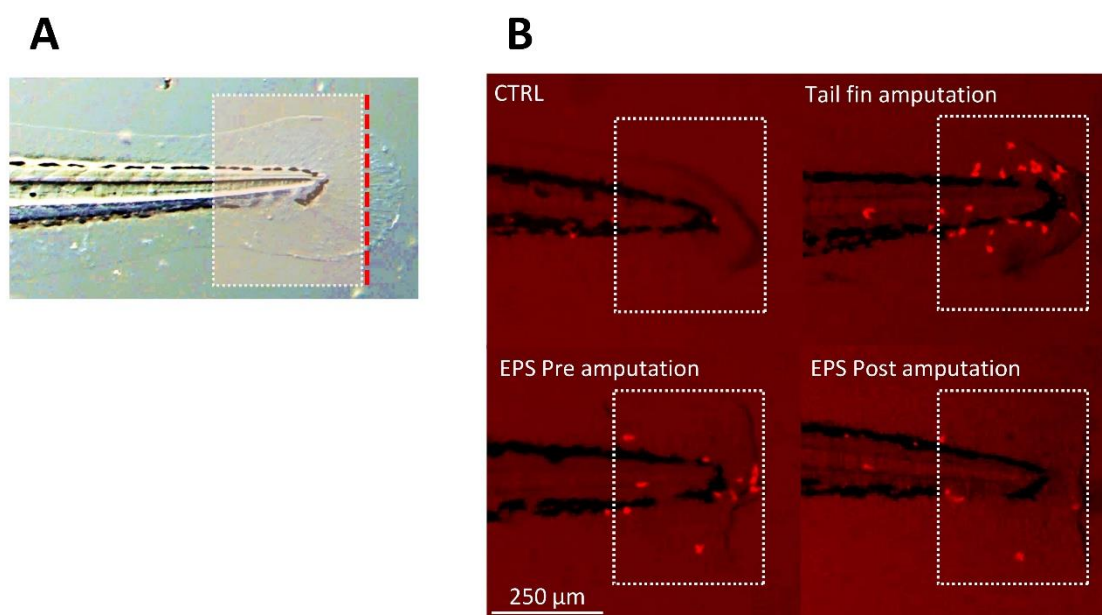13  
14  
15  
16  
17

Figure S2. (A) Image of the tail of a 3 dpf zebrafish larvae, showing the position of the caudal tail amputation (red line) and the area designated for counting neutrophils number. (B) Representative fluorescence microscopy images of wound-induced migration of neutrophils, in the four experimental conditions.

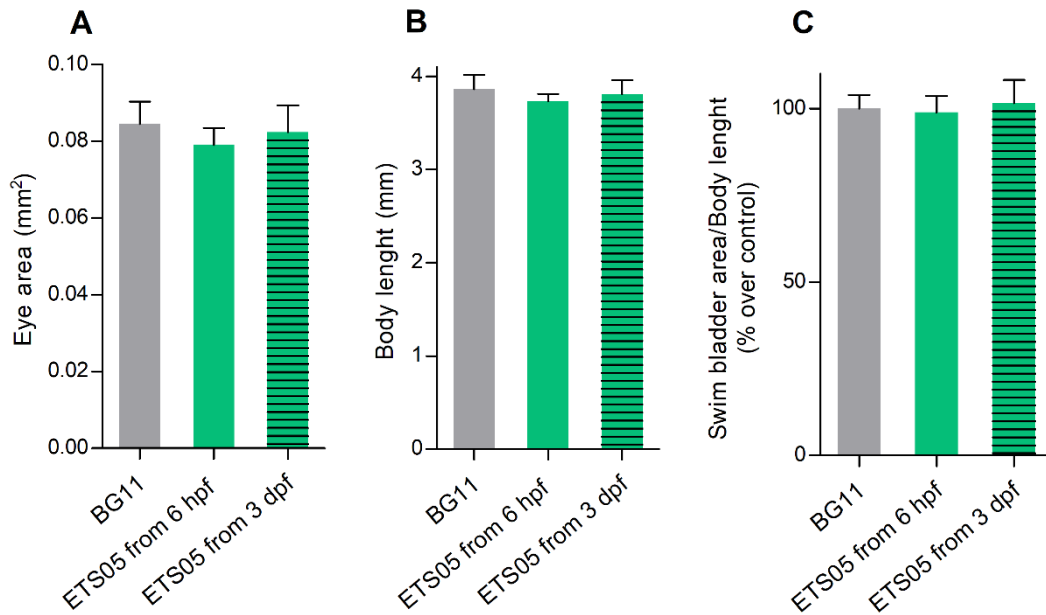

18

19 **Figure S3.** Morphological parameters analyzed on 5 dpf zebrafish larvae after co-culture with *Phormidium* at  
 20 initial concentration of 0.3 (OD value) for either 5 days or 2 days. **A:** eye area; **B:** body length; **C:** swim bladder  
 21 area. To avoid redundancy only results obtained with the higher *Phormidium* concentration used are shown. The  
 22 data represent the mean±SD of three independent experiments each conducted with 12-15 larvae. Statistical  
 23 analysis was performed using GraphPad Prism 7 (One-way ANOVA followed by Tukey’s multiple comparison  
 24 test).

25

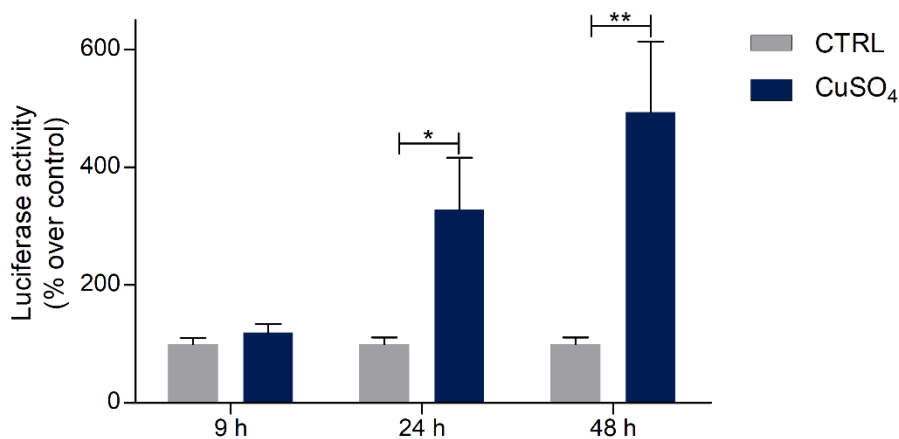

26

27 **Figure S4.** Copper treatment results in NF-κB pathway activation. Induction was analysed with the zebrafish  
 28 transgenic line NFκB:GFP, Luc at three time points and was calculated by dividing luciferase values from treated  
 29 larvae by values of untreated siblings. The data represent the mean±SEM of a single experiment conducted with  
 30 20 larvae. Statistical analysis was performed using GraphPad Prism 5 (Unpaired t test with Welch’s correction).  
 31 Statistical significance: \* p ≤ 0.05, \*\* p ≤ 0.01.

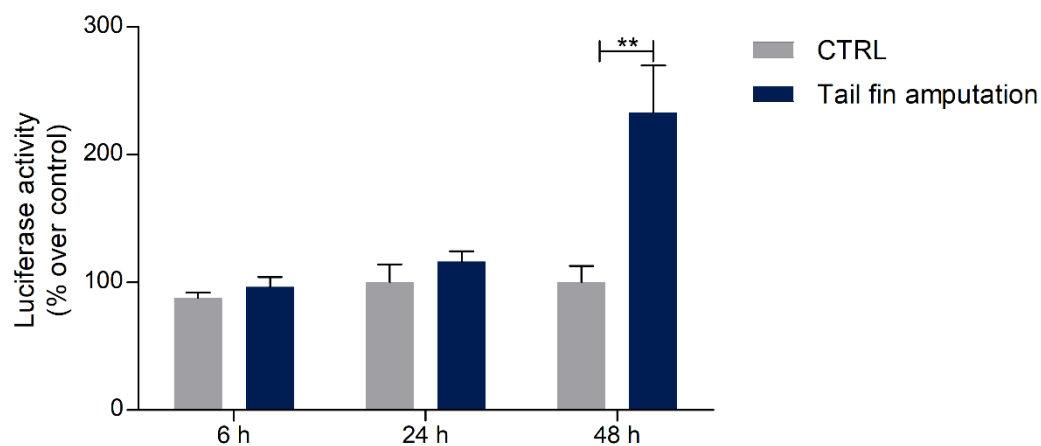

32

33 Figure S5. Caudal fin amputation results in NF- $\kappa$ B pathway activation. Induction of NF- $\kappa$ B activity was analyzed  
34 with the zebrafish transgenic line NF $\kappa$ B:GFP,Luc at three time points and was calculated by dividing luciferase  
35 values from treated larvae by values of untreated siblings. The data represent the mean $\pm$ SEM of a single  
36 experiment conducted with 20 larvae. Statistical analysis was performed using GraphPad Prism 5 (Unpaired t  
37 test with Welch's correction). Statistical significance: \*\*  $p \leq 0.01$ .
